# Supplementary material for: NommPred: Prediction of Mitochondrial and Mitochondrion-Related Organelle Proteins of Nonmodel Organisms
Source: PubMed Central journal article supplement — Evol Bioinform Online. 2018 Dec 23;14:1176934318819835. doi: 10.1177/1176934318819835 (PMC6305954; doi:10.1177/1176934318819835), 2018-12-23
Supplement: Supplementary_Figure_1_xyz11796ba3b28fd.pdf [file Supplementary_Figure_1_xyz11796ba3b28fd.pdf]

Step 1.

Selecting one taxonomic group for a 'target' group, and selecting another taxonomic group for a 'factor' group.

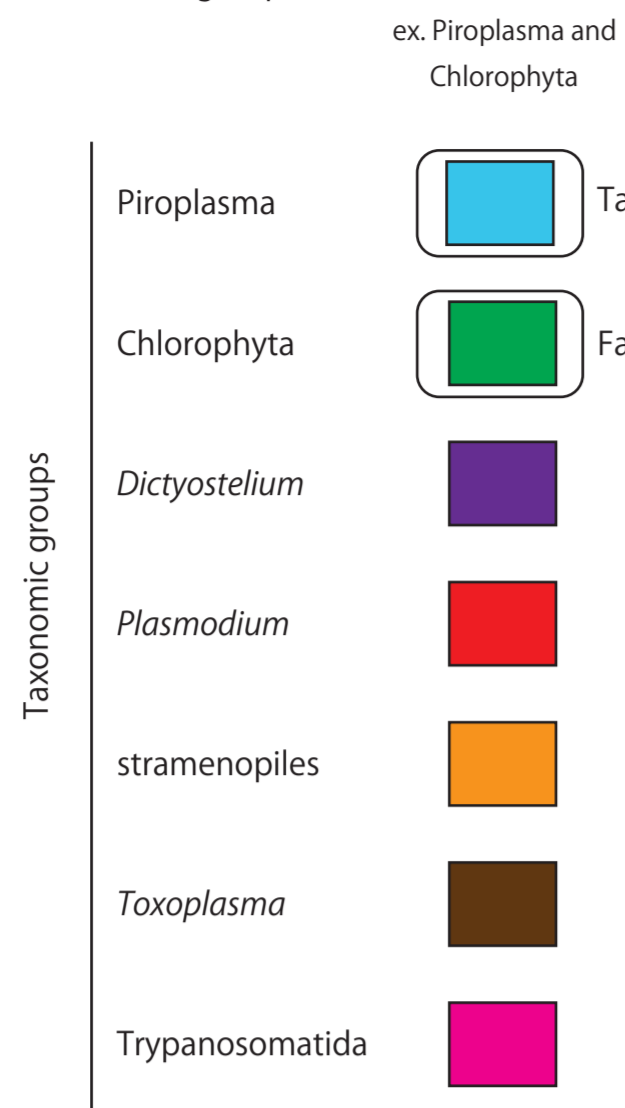

Step 2.

Creating all  $2^5$  combinations of the other taxonomic groups ('control' datasets).

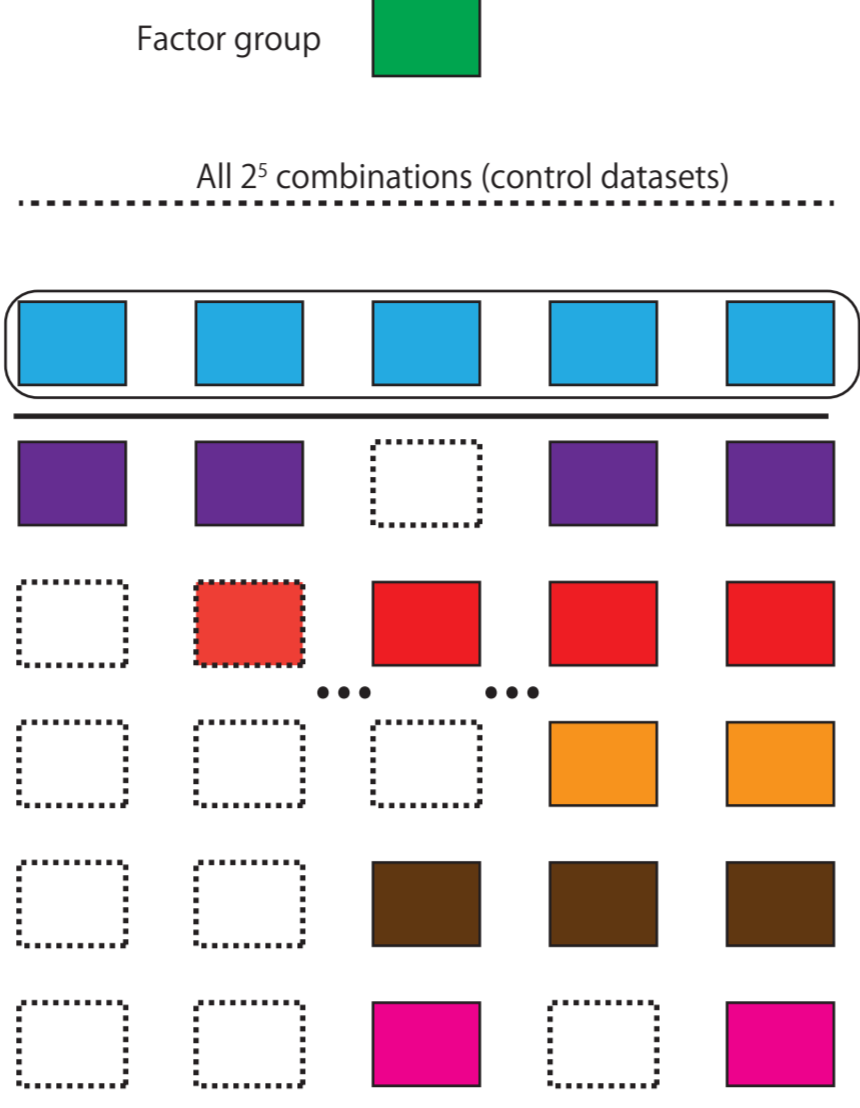

Step 3.

Adding factor group for all combinations and creating each predictor of the all  $2^5$  combinations ('experimental' datasets).

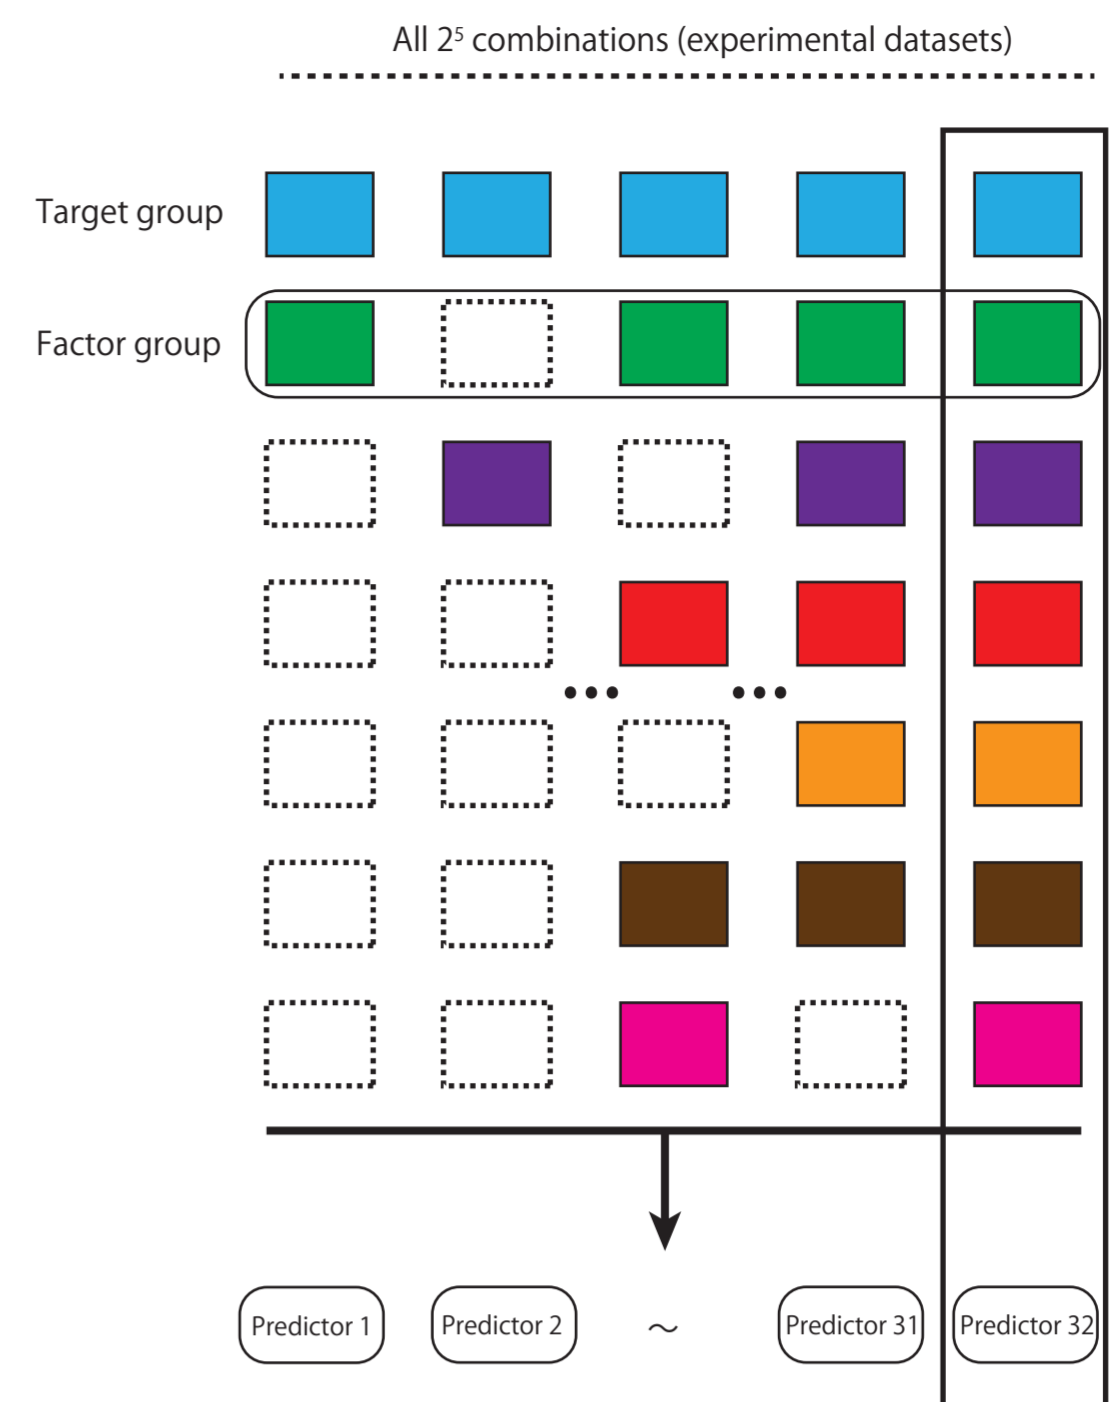

Step 4.

On control and experimental datasets, each predictor was trained in three-fold cross validation repeatedly 100 times. ex. Predictor 32

4.1. Datasets were combined except for target group.

4.2. These two datasets were randomly divided into three subsets.

4.3. Randomly selecting one of the three subsets of target group as test dataset. Next, merging the other two of the three subsets of target group with two of the three subsets of combined dataset for training dataset.

4.4. Training the predictor, and calculating a ROC AUC score using the test dataset.

Control Dataset

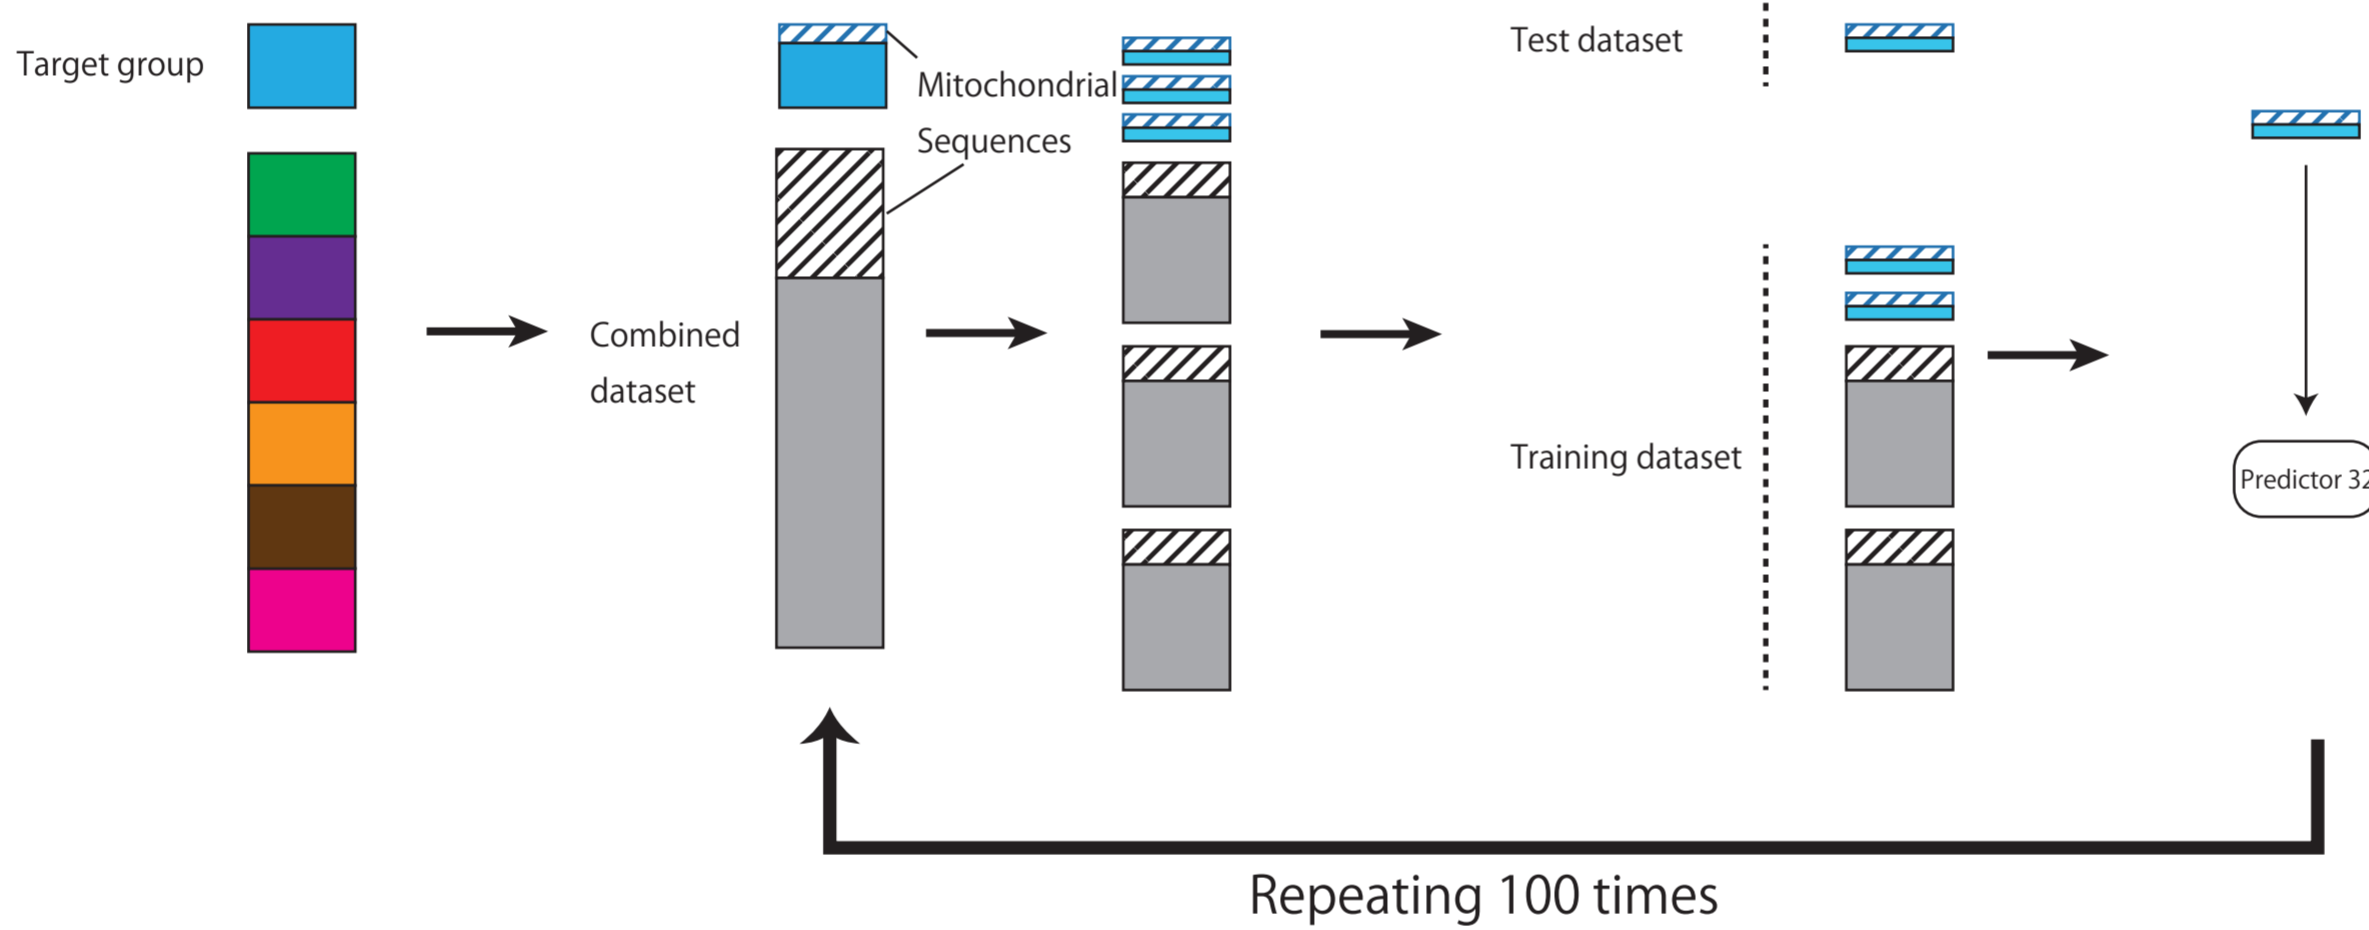

Step 5.

Calculating a mean of 100 ROC AUC scores for each of the paired  $2^5 + 2^5$  predictors.

| Control              | Experimental         |
|----------------------|----------------------|
| Predictor 1 0.91145  | Predictor 1 0.92916  |
| Predictor 2 0.91979  | Predictor 2 0.93125  |
| ...                  | ...                  |
| Predictor 31 0.92708 | Predictor 31 0.93281 |
| Predictor 32 0.92812 | Predictor 32 0.93489 |

Step 6.

Performing Wilcoxon signed rank test for between the mean scores of the above paired predictors.

Step 7.

Showing results as table.

Step 8.

Repeating the steps until all combinations of taxonomic groups were selected.

Experimental Dataset

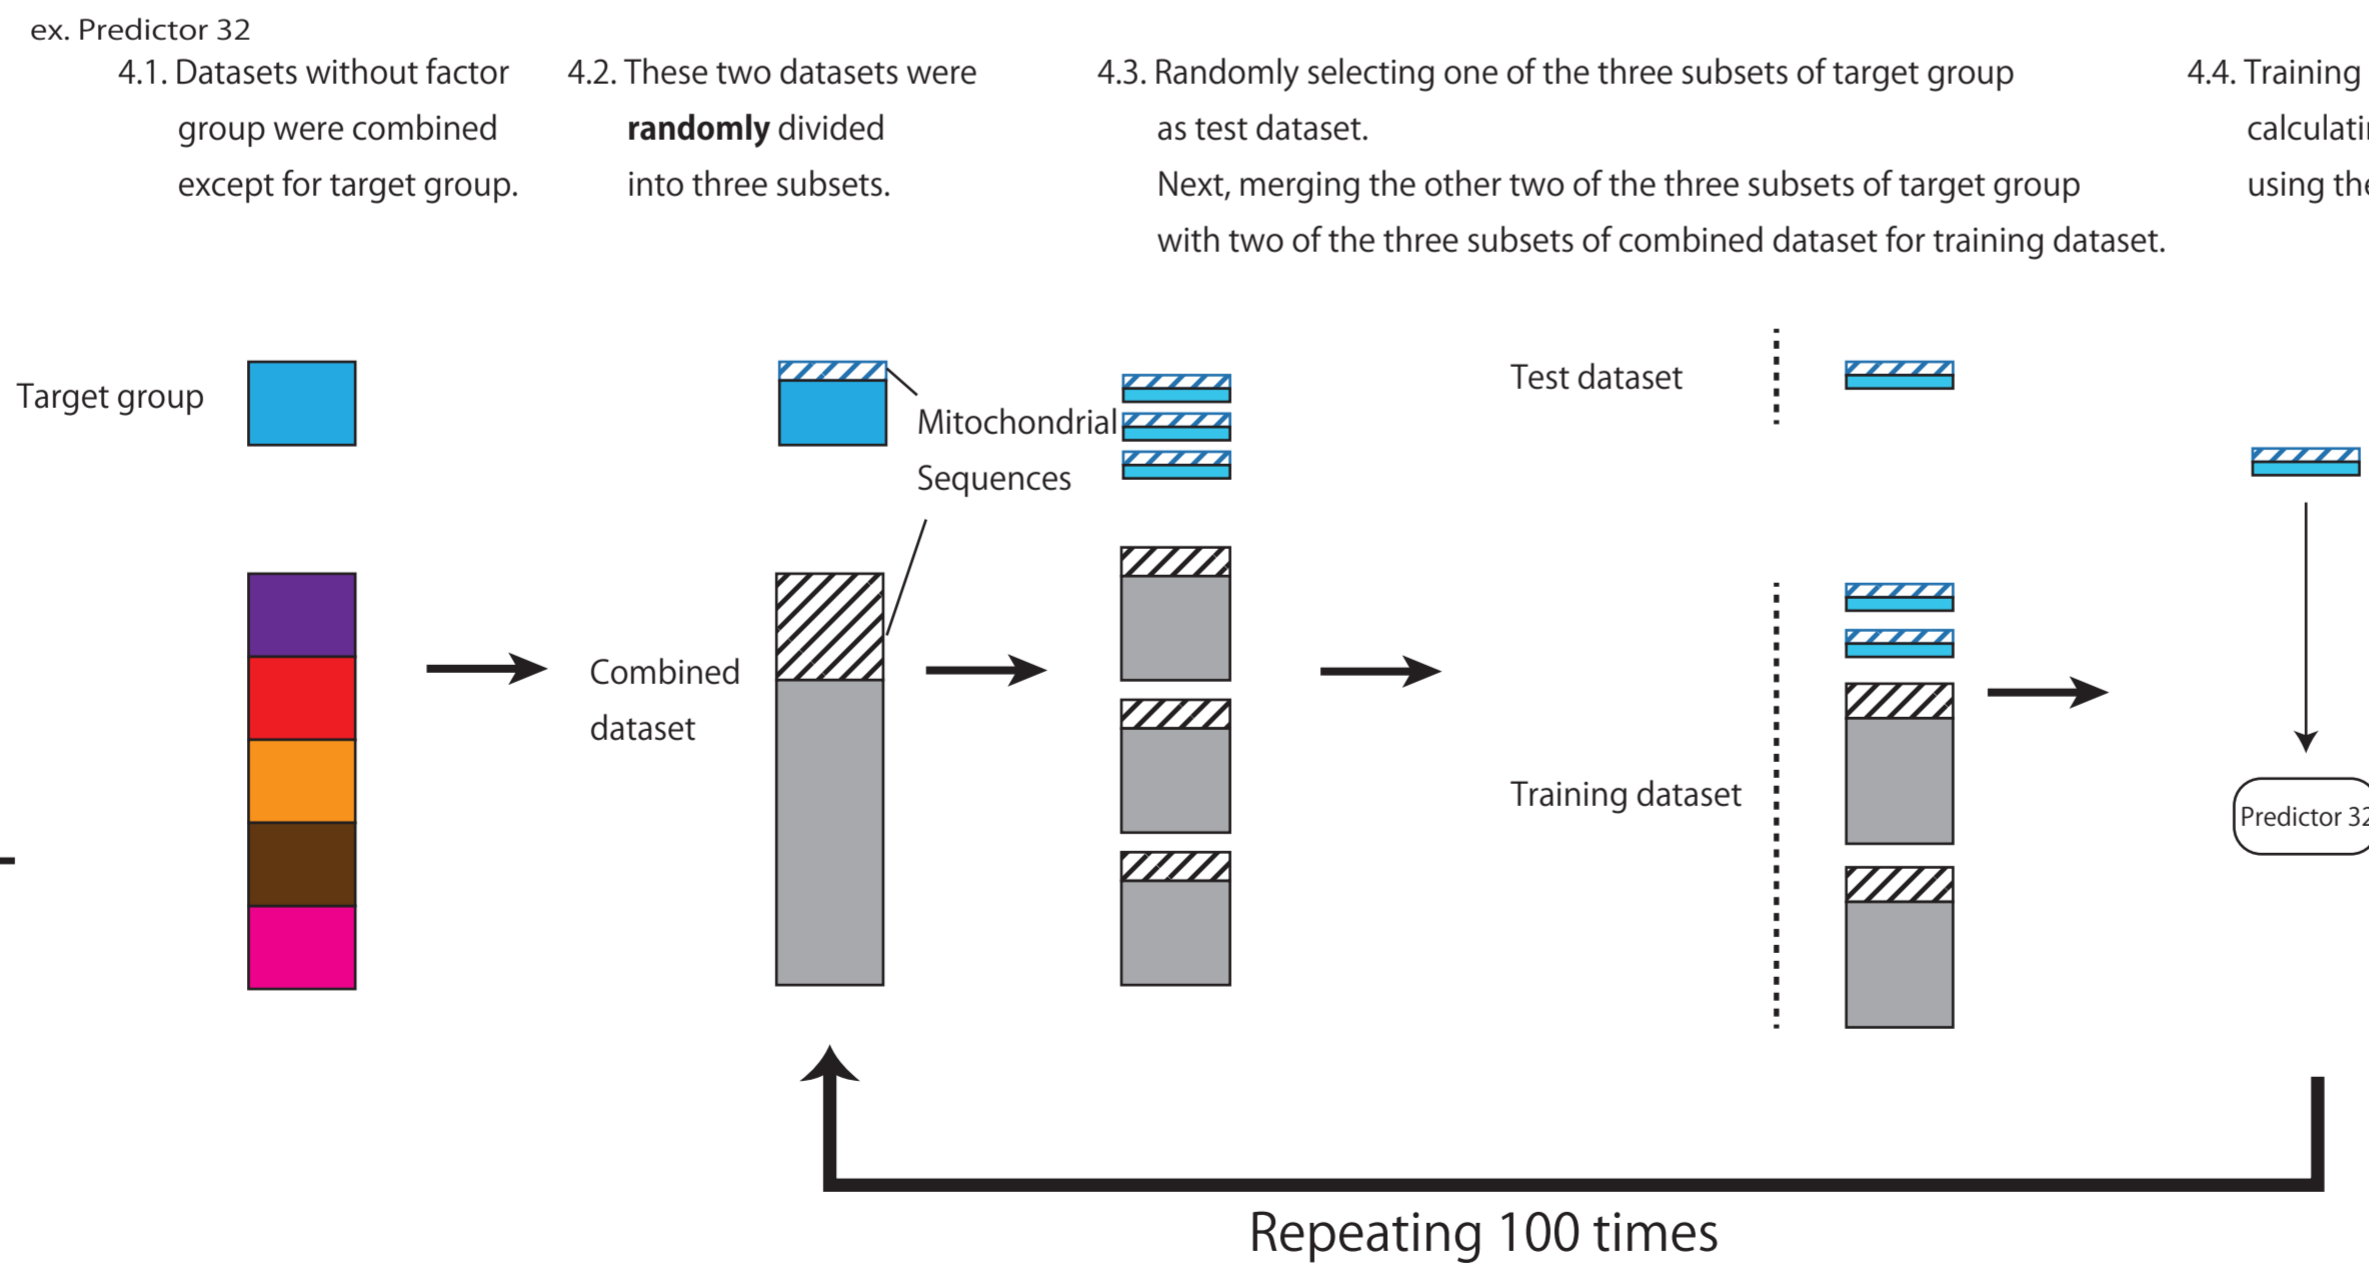

Repeating for the other taxonomic groups

Repeating the steps
